# Supplementary material
Source: PubMed Central journal article supplement (PMC3812678)
Supplement: NIHMS485257-supplement-1.pdf [file NIHMS485257-supplement-1.pdf]

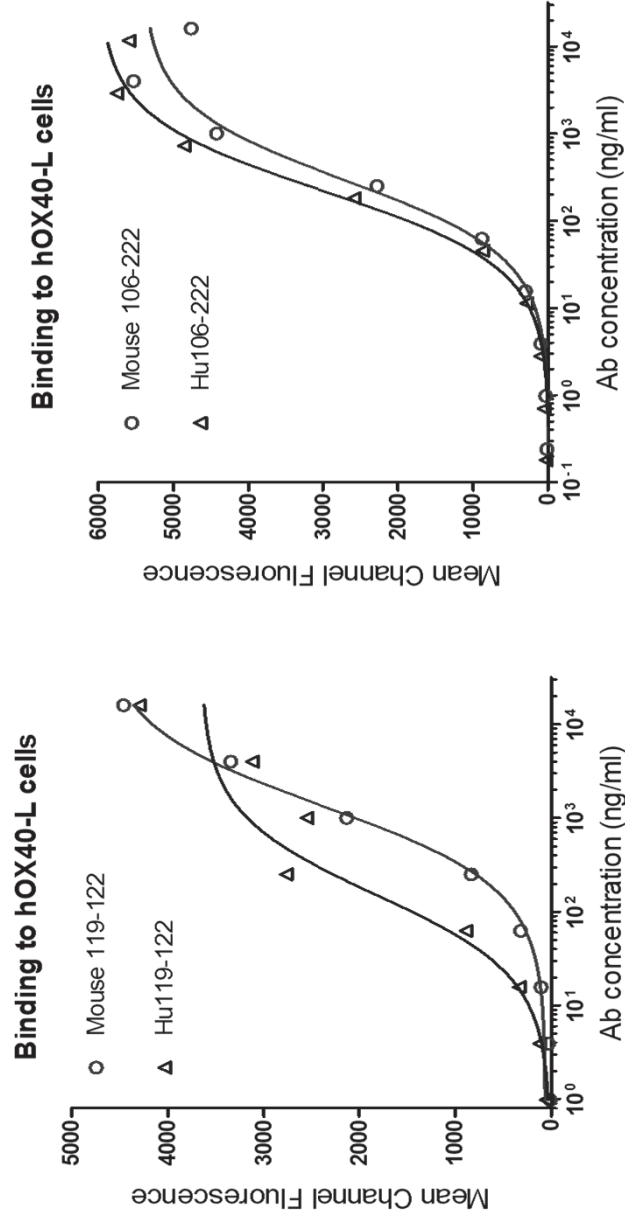

**Supplementary Figure 1: Binding affinity of humanized anti-hOX40 mAbs to human OX40.** Binding of mouse 106-222, Hu106-222, mouse 119-122 and Hu119-122 antibodies to OX40 was examined in a FACS binding assay with human OX40-expressing L cells (hOX40-L). Antibodies bound to hOX40-L cells were detected with PE-labeled goat anti-mouse Ig antibody (for mouse antibodies) or PE-labeled goat anti-human Ig antibody (humanized antibodies). Supplementary Figure 1 shows the analysis for anti-hOX40 mAbs binding to hOX40-L cells. The titration curve of Hu106-222 was nearly identical to that of mouse 106-222, indicating that the antigen binding affinity of mouse 106-222 is retained in Hu106-222; however, due to the difference of the secondary antibodies, the data only indicates that the affinity of mouse 106-222 is similar to that of Hu106-222.
